# Supplementary material
Source: MDPI journal article supplement (https://www.mdpi.com/1999-4907/8/4/132)
Supplement: s1 [file s1]

**Table S1.** Monthly and annual mean canopy temperature (°C) for Erman’s birch growing along an altitudinal gradient on the north-facing slope of Changbai Mountain.

| Altitude (m a.s.l.) | Jan | Feb | Mar | Apr | May | Jun | Jul | Aug | Sep | Oct | Nov | Dec | Annual |
| --- | --- | --- | --- | --- | --- | --- | --- | --- | --- | --- | --- | --- | --- |
| 1400 | −16.5 | −13.9 | −10.4 | −2.8 | 3.2 | 11.4 | 14.6 | 15.0 | 10.0 | 2.9 | −7.7 | −14.8 |  |
| 1600 | −17.0 | −15.1 | −11.8 | −5.5 | 0.9 | 9.2 | 12.7 | 13.8 | 8.4 | 1.4 | −8.5 | −15.4 | −2.2 |
| 1800 | −17.5 | −15.9 | −12.7 | −7.6 | −0.5 | 8.5 | 12.1 | 12.9 | 8.1 | 0.7 | −8.8 | −15.9 | −3.0 |
| 1900 | −17.3 | −15.7 | −12.5 | −7.7 | −0.7 | 8.3 | 12.0 | 13.0 | 8.2 | 0.7 | −8.6 | −15.7 | −3.0 |
| 2000 | −17.6 | −16.1 | −12.8 | −8.2 | −1.1 | 8.0 | 11.7 | 12.6 | 7.8 | 0.4 | −8.8 | −16.1 | −3.4 |
| 2100 | −17.4 | −15.9 | −12.5 | −7.5 | −0.6 | 8.1 | 11.7 | 12.5 | 7.7 | 0.4 | −8.6 | −15.9 | −3.2 |

Note: Unit of air temperature (°C).

**Table S2.** Annual average soil temperature (10 cm-depth) and length of growing season.

| Indicators | Altitude (m a.s.l.) | | | | |
| --- | --- | --- | --- | --- | --- |
| 1600 | 1800 | 1900 | 2000 | 2100 |
| 10 cm-depth soil temperature (°C) | 9.4 | 9.8 | 8.2 | 7.8 | 8.6 |
| Length of growing season (days) | 142 | 137 | 131 | 128 | 118 |

Note: The beginning of the growing season was defined as the date at which the weekly mean soil temperatures in the shade at 10 cm depth first exceeded 0 °C, and the end of the growing season as the date at which the weekly mean canopy air temperatures first dropped below 0 °C.

**Figure S1.** Soil volumetric water content (VWC %) in ten plots in the treeline ecotone (*n* = 170 samples) on the north slope of Changbai Mountain.

**Figure S2.** Micro-site effects on soil volumetric water content (VWC %) in 10 cm and 20 cm depth along an altitudinal gradient on the north-facing slope of Changbai Mountain. Soil moisture was greatly affected by soil depth, VWC at 20 cm-depth was much higher than that at 10 cm-depth, whereas, no significant difference was detected within altitudes.


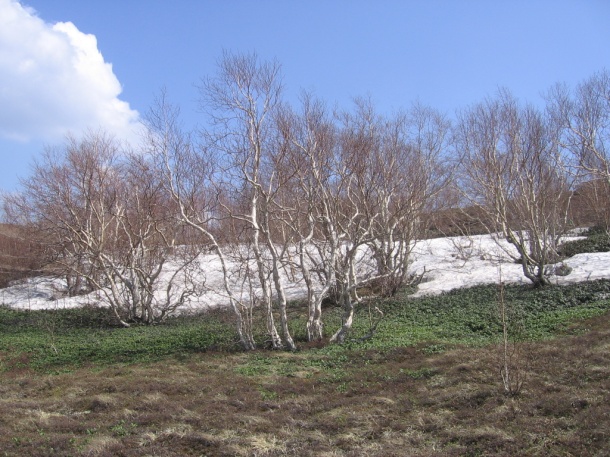


**Figure S3.** Presence of flag-shaped and supine Erman’s birches at 1800 m (a.s.l.) indicates high wind speed at this altitude.


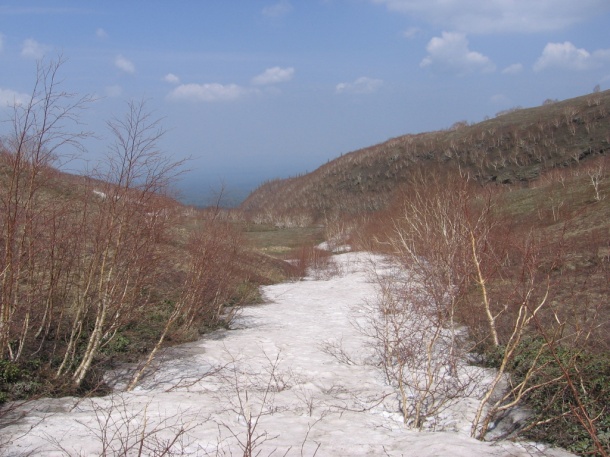

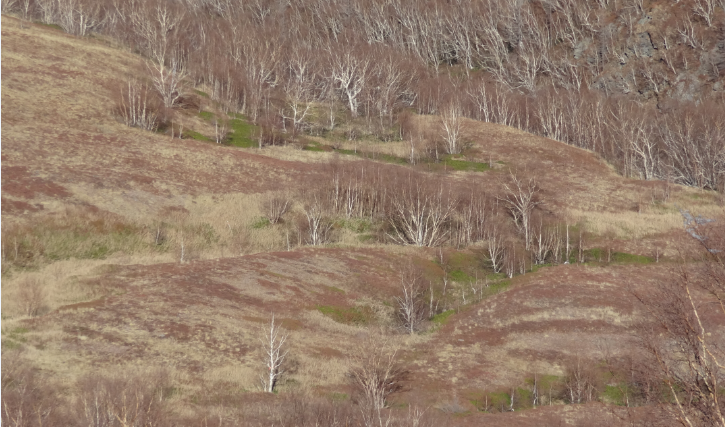


**(b)**

**(a)**

**Figure S4.** Distribution patterns of Erman’s birch associated with snow cover in mid-winter (**a**) and micro-topography (**b**).

**Figure S5.**Abundance of Erman’s birch with different tree form classes in relation to soil properties (C—total carbon, N—total nitrogen, P—total phosphorus, C:N—the ratio of C to N, and N:P—the ratio of N to P) and snow depth, assessed with Redundancy Analysis (RDA). Abundance of saplings displayed a high correlation with snow depth.
